# Supplementary material for: FAM83D directs protein kinase CK1α to the mitotic spindle for proper spindle positioning
Source: PubMed Central journal article supplement (PMC6726907; doi:10.15252/embr.201847495), 2019-07-24

Figure 2D

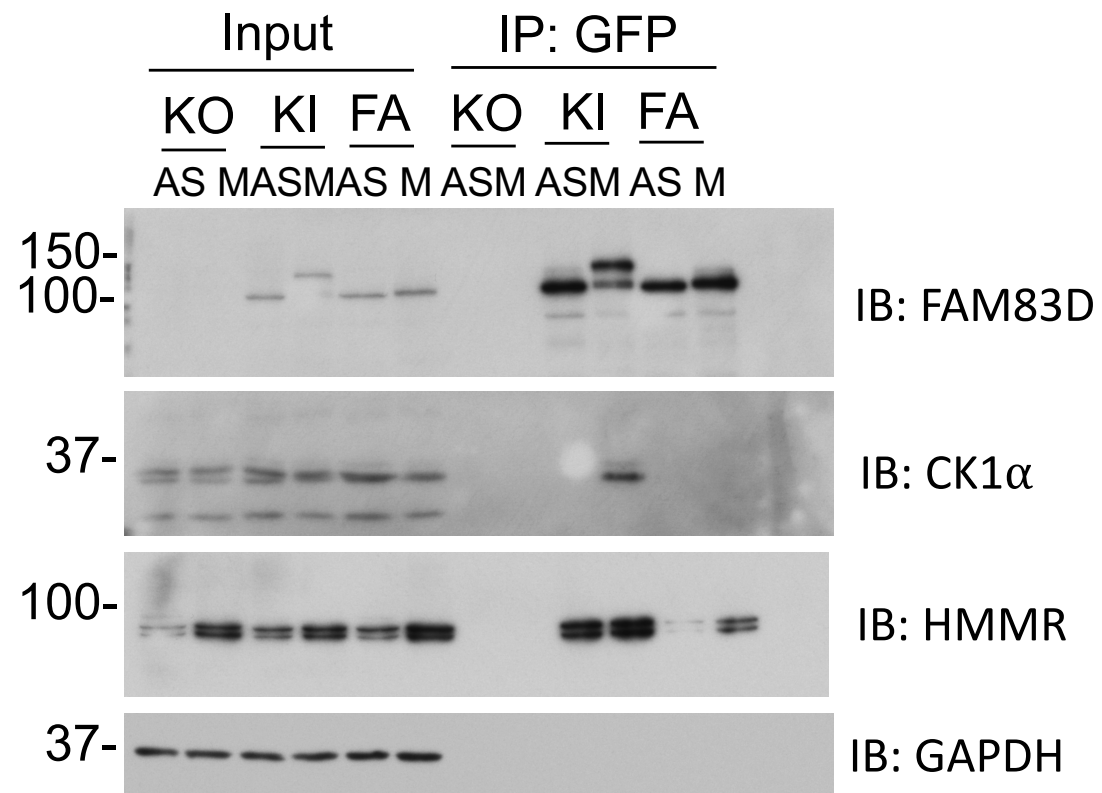

Figure 2F

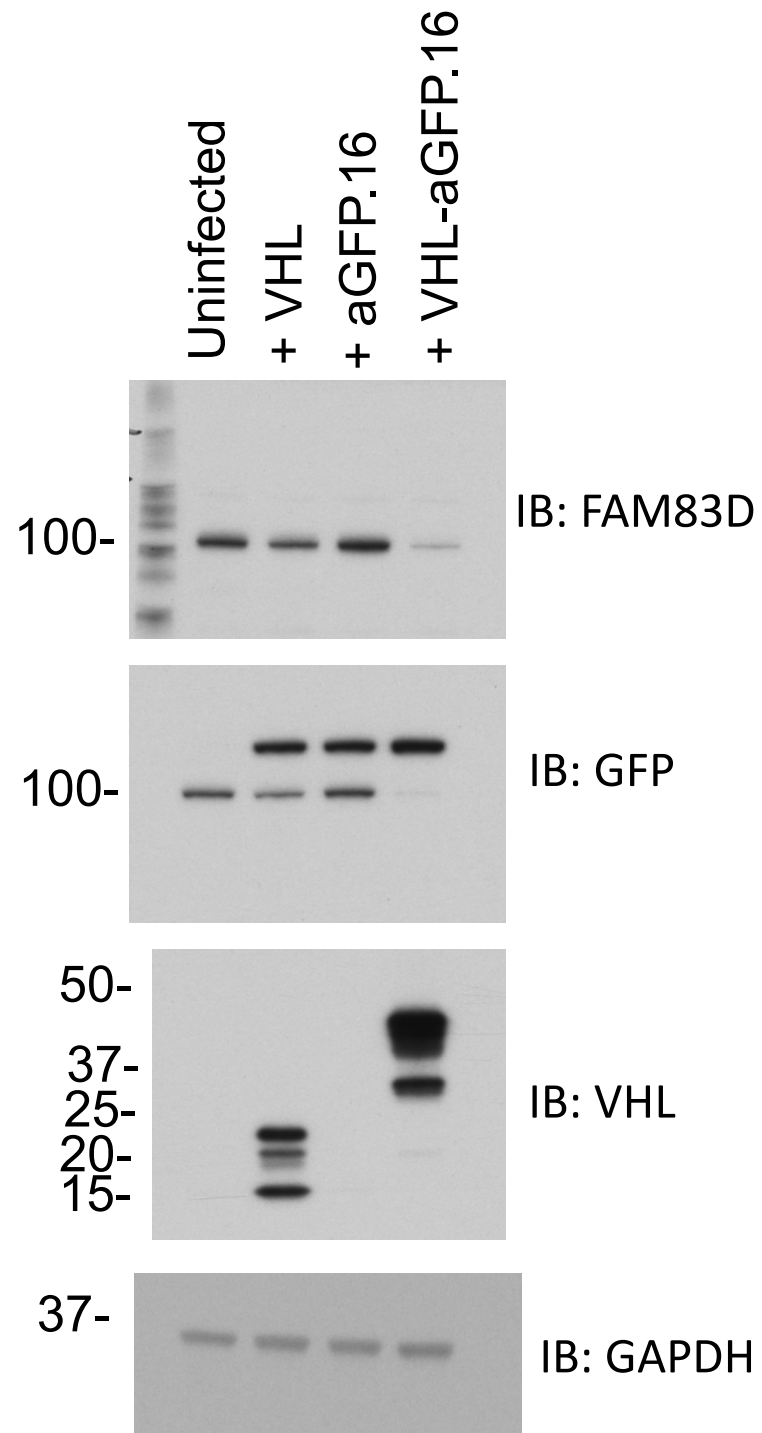

Supplement: EMBR-20-e47495-s012.pdf [file EMBR-20-e47495-s012.pdf]
