# Supplementary material for: FAM83D directs protein kinase CK1α to the mitotic spindle for proper spindle positioning
Source: PubMed Central journal article supplement (PMC6726907; doi:10.15252/embr.201847495), 2019-07-24

Figure 4A

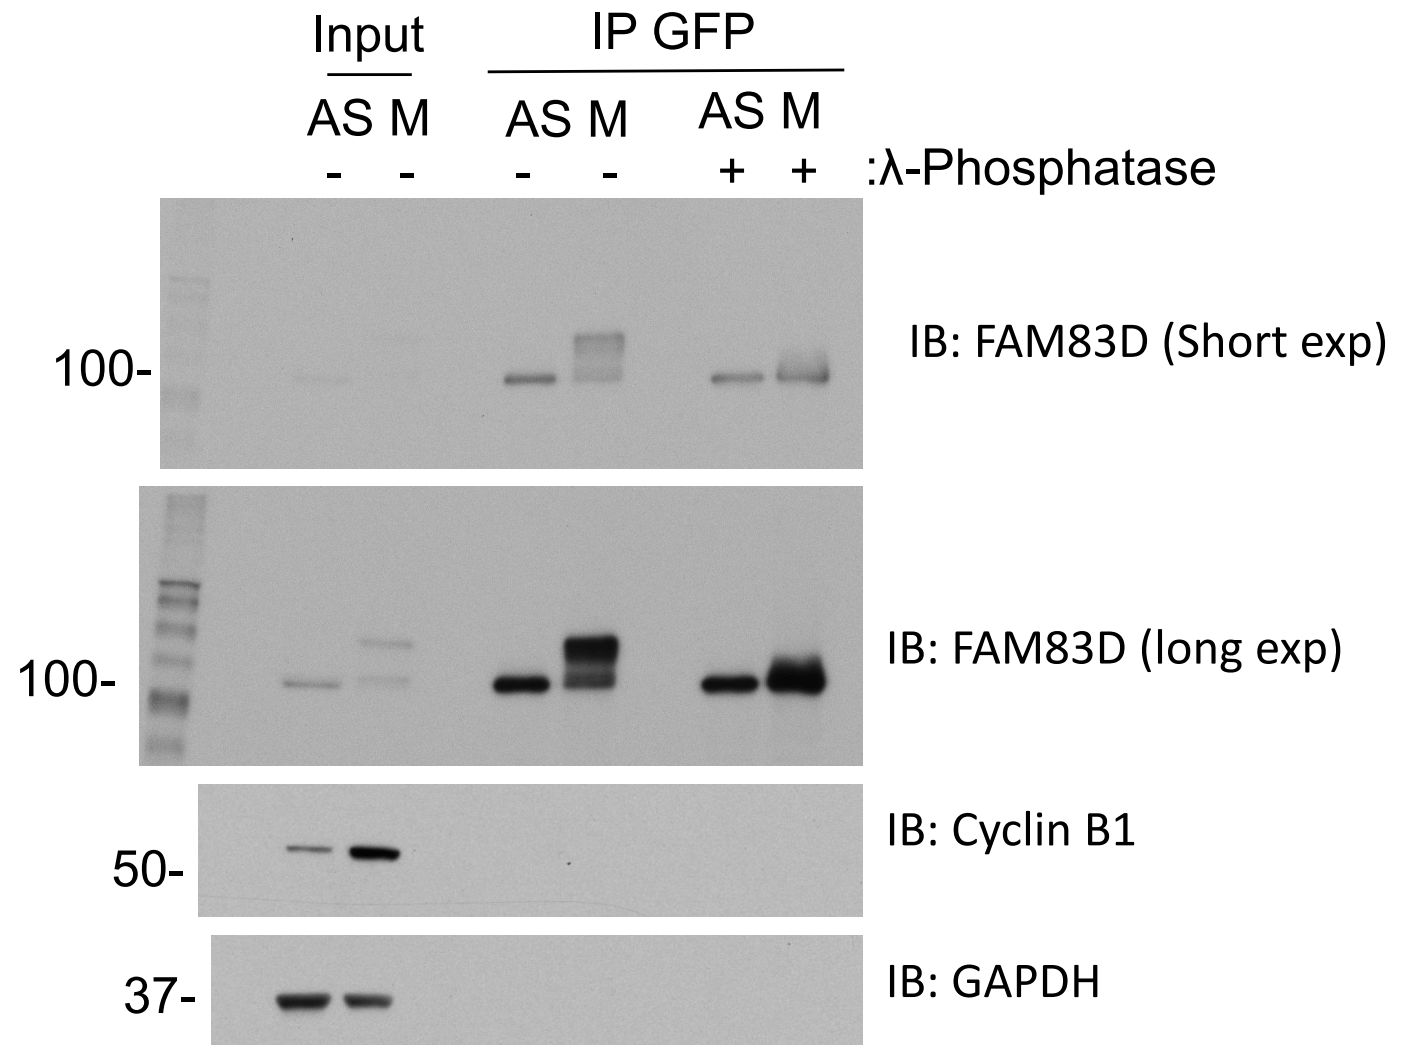



**Figure 4C**

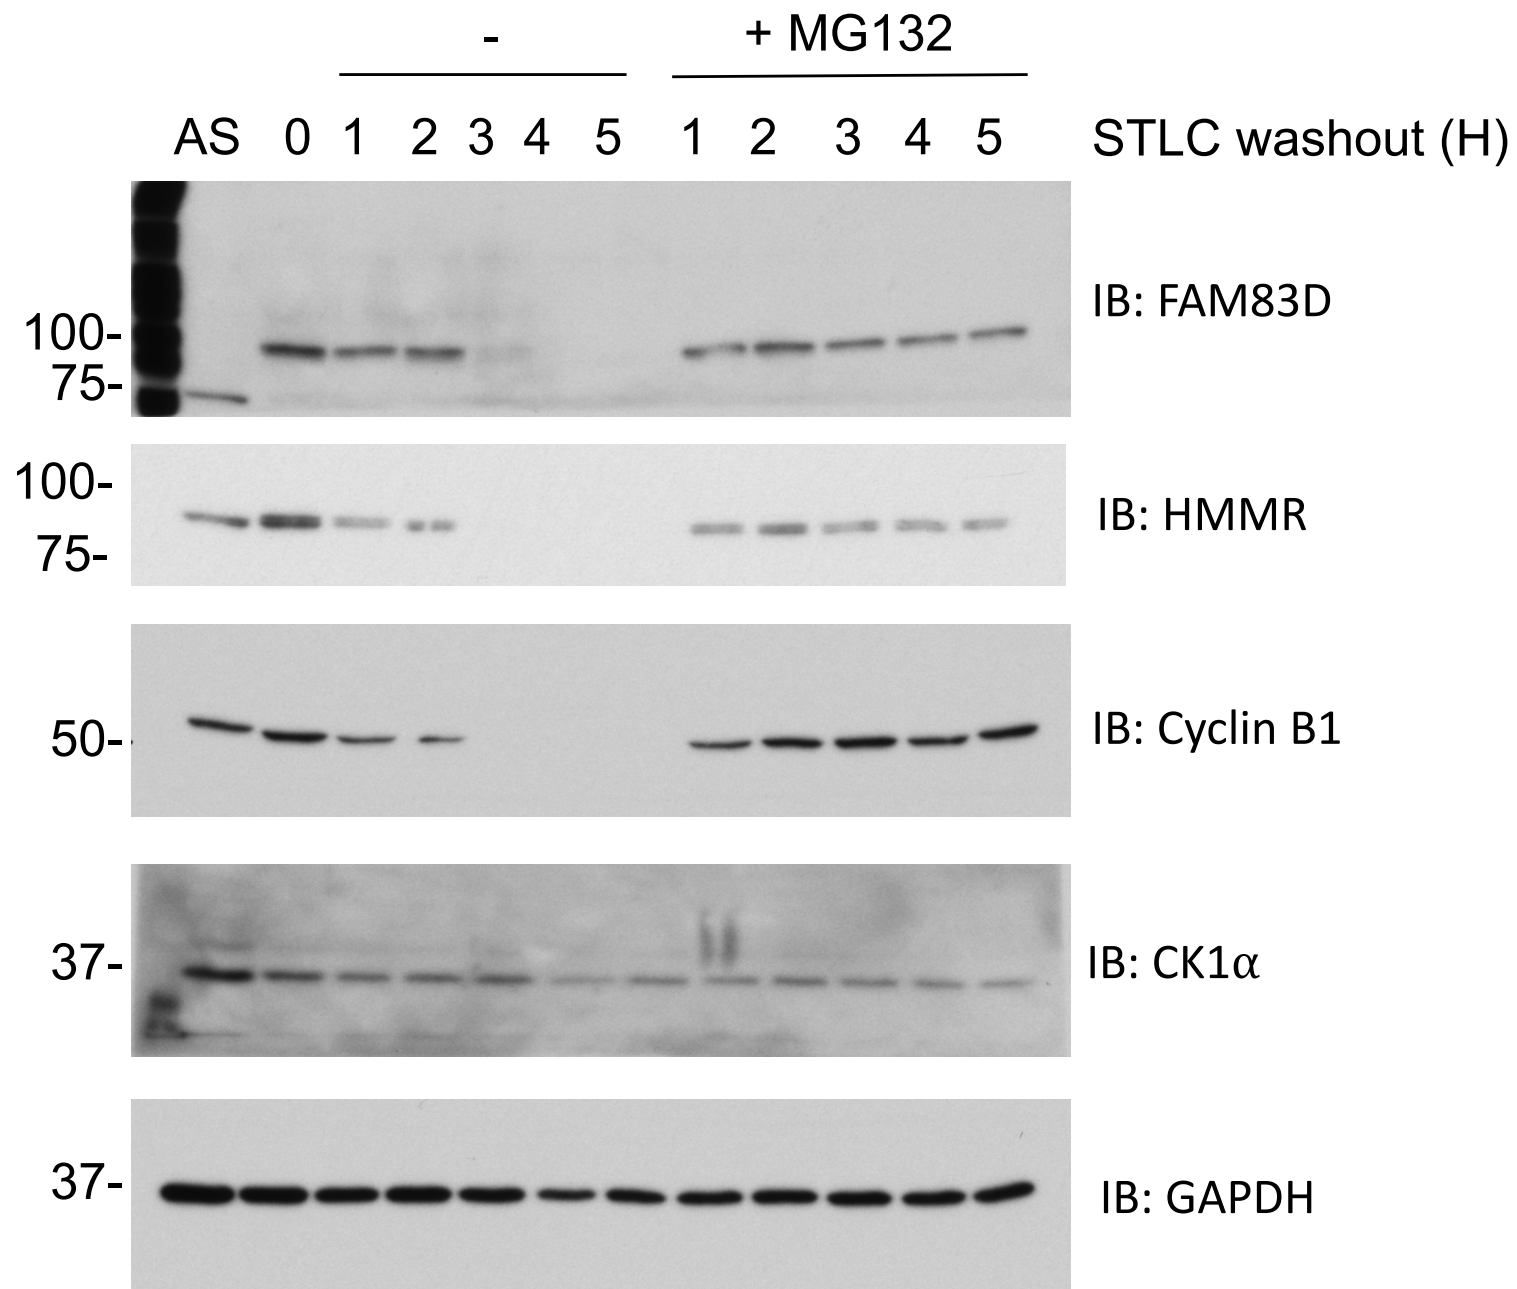



Figure 4E

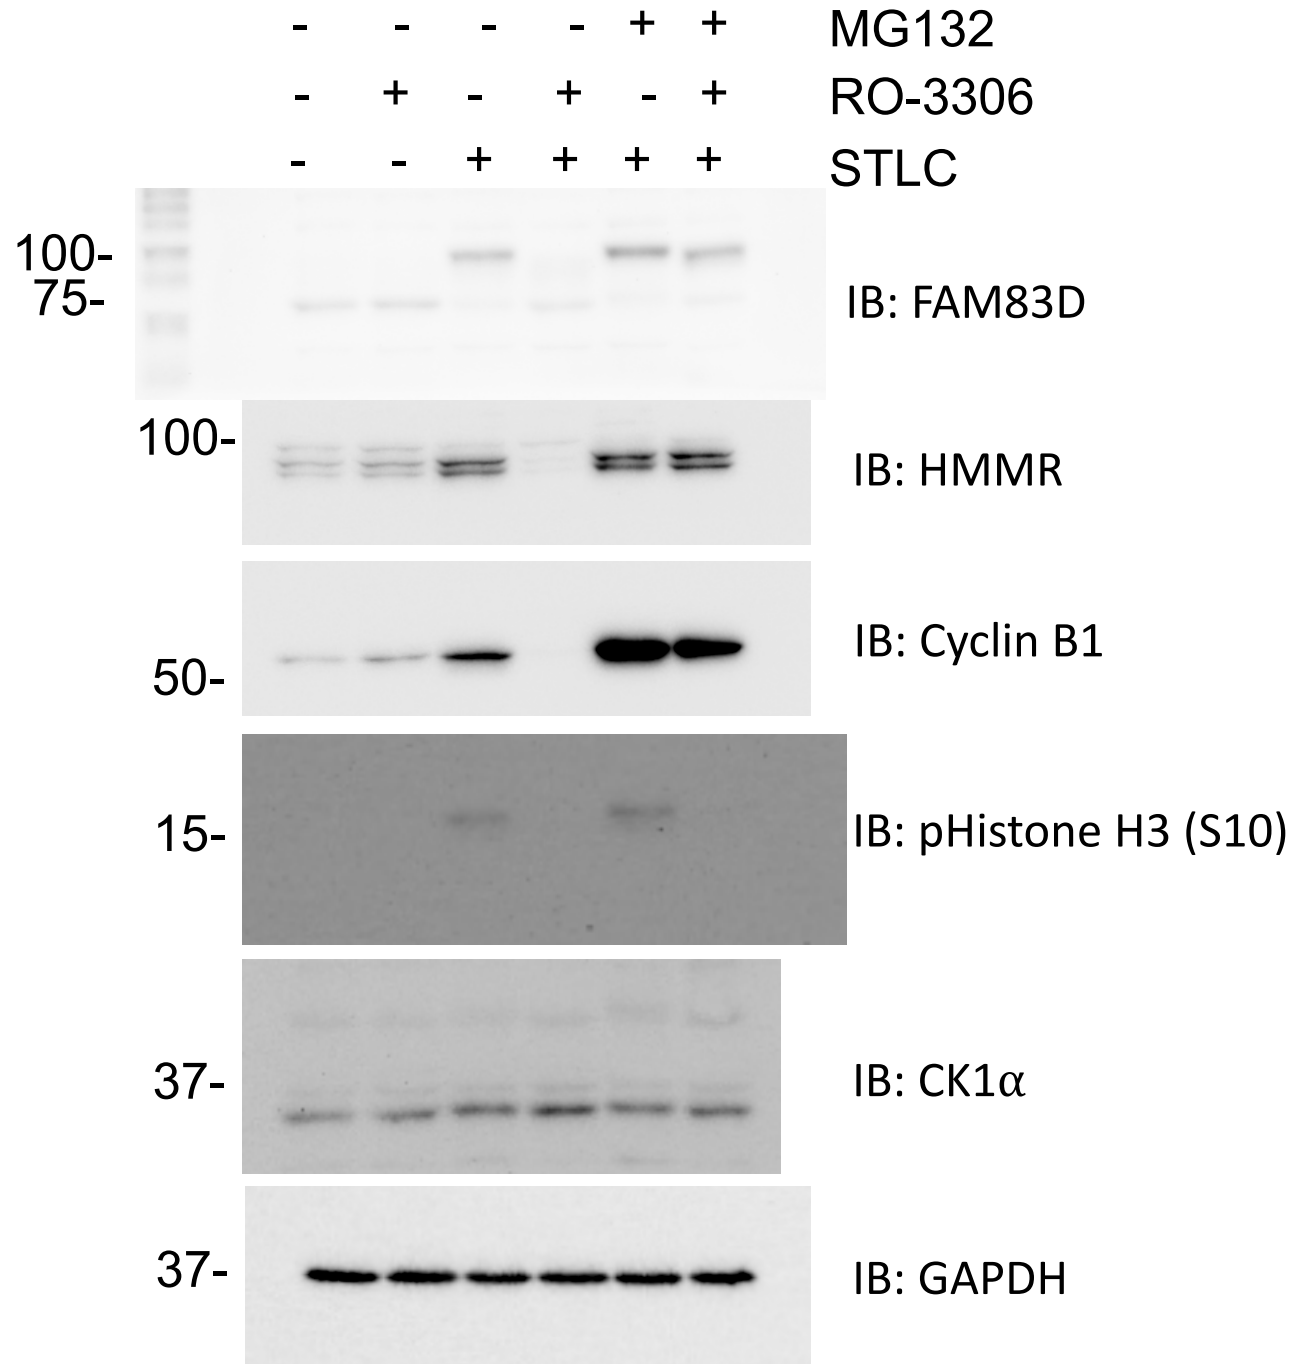

Figure 4H

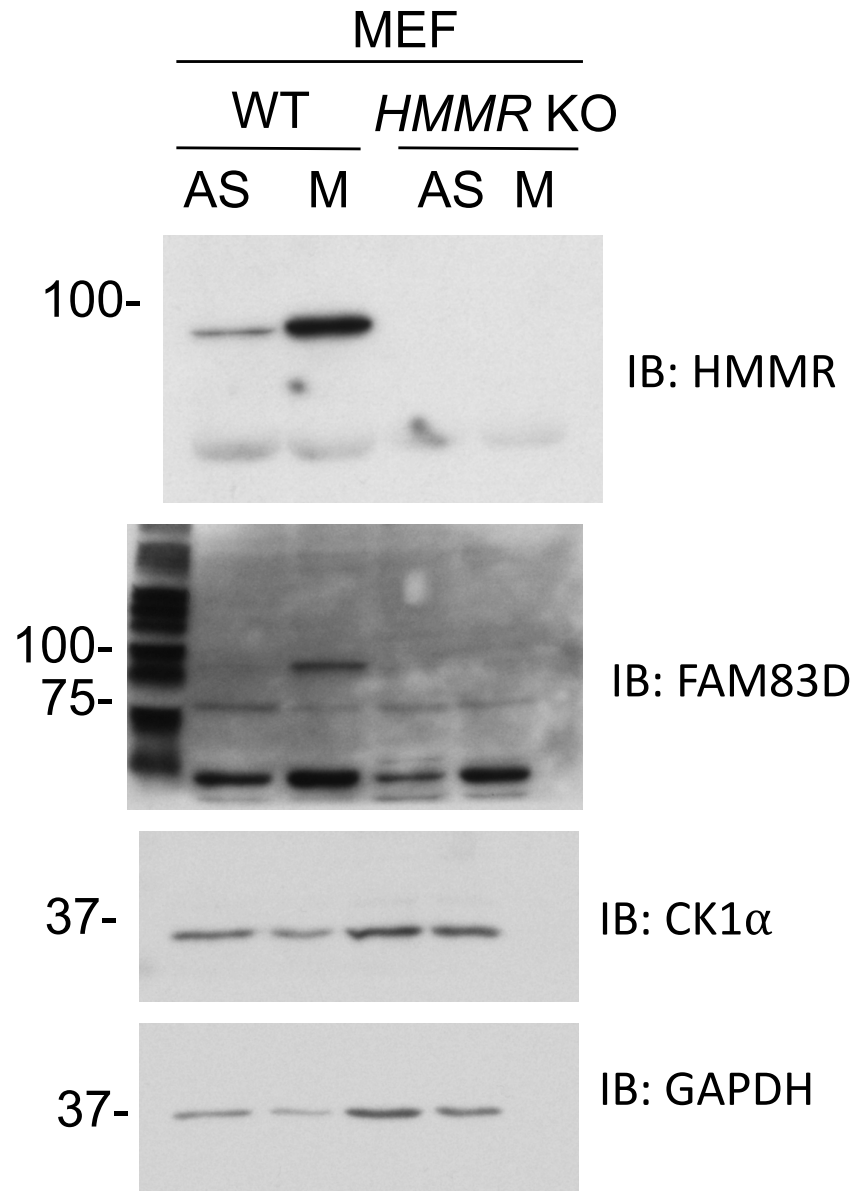

Supplement: EMBR-20-e47495-s014.pdf [file EMBR-20-e47495-s014.pdf]
